# Supplementary material for: Evaluating alternative ebullition models for predicting peatland methane emission and its pathways via data-model fusion
Source: Copernicus journal article supplement (doi:10.5194/bg-2021-316), 2021-12-20
Supplement: Supplementary file 1 [file bg-2021-316-supplement.pdf]

## Supplementary Material

Shuang Ma<sup>1,2,3</sup>, Lifen Jiang<sup>1</sup>, Rachel M. Wilson<sup>4</sup>, Jeff P. Chanton<sup>4</sup>, Scott Brigham<sup>5</sup>, Shuli Niu<sup>6</sup>, Colleen M. Iversen<sup>7</sup>, Avni Malhotra<sup>7,8</sup>, Jiang Jiang<sup>9</sup>, Xingjie Lu<sup>10</sup>, Yuanyuan Huang<sup>11</sup>, Jason Keller<sup>12</sup>, Xiaofeng Xu<sup>13</sup>, Daniel M. Ricciuto<sup>7</sup>, Paul J. Hanson<sup>7</sup>, Yiqi Luo<sup>1,2</sup>

<sup>1</sup> Center for Ecosystem Science and Society, Northern Arizona University, Flagstaff, Arizona, USA

<sup>2</sup> Department of Biological Sciences, Northern Arizona University, Flagstaff, Arizona, USA

<sup>3</sup> Jet Propulsion Laboratory, California Institute of Technology, Pasadena, CA, USA

<sup>4</sup> Earth, Ocean and Atmospheric Sciences, Florida State University, Tallahassee, Florida, USA

<sup>5</sup> Institute of Ecology & Evolution, University of Oregon, Eugene, Oregon, USA

<sup>6</sup> Key Laboratory of Ecosystem Network Observation and Modeling, Institute of Geographic Sciences and Natural Resources Research, Chinese Academy of Sciences, Beijing, China

<sup>7</sup> Environmental Sciences Division and Climate Change Science Institute, Oak Ridge National Laboratory, Oak Ridge, Tennessee, USA

<sup>8</sup> Department of Earth System Science, Stanford University, Stanford, California, USA

<sup>9</sup> Department of Soil and Water Conservation, Nanjing Forestry University, Nanjing, Jiangsu, China

<sup>10</sup> School of Atmospheric Sciences, Sun Yat-sen University, Guangzhou, Guangdong, China

<sup>11</sup> CSIRO Oceans and Atmosphere, Aspendale, Victoria, Australia

<sup>12</sup> Schmid College of Science and Technology, Chapman University, Orange, USA

<sup>13</sup> Biology Department, San Diego State University, San Diego, California, USA

*Correspondence to:* Yiqi Luo ([yiqi.luo@nau.edu](mailto:yiqi.luo@nau.edu))

© 2021. All rights reserved.

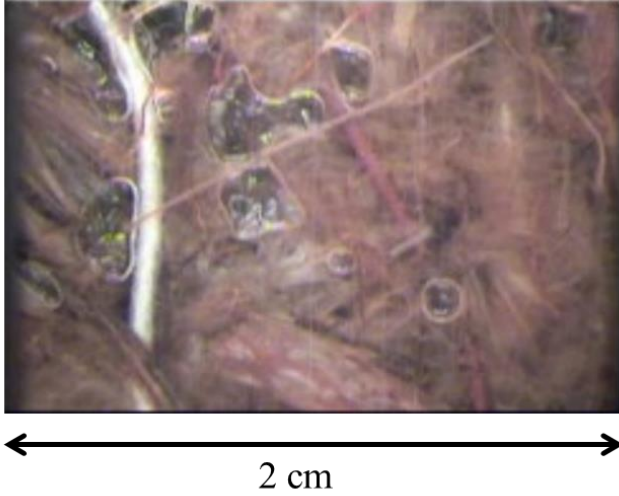

**Figure S1:** Small bubbles at 20cm depth belowground, captured by manual minirhizotron at treed area from an ambient plot, August, 2016. Photo credit: John Latimer and Colleen M Iversen.
